# Supplementary material
Source: publisher site journal article supplement (https://www.dovepress.com/article/296972)
Supplement: Supplementary file 1 [file get_supplementary_file.php]

# **Supplementary Materials**

**Typical Examples of US Presentations of Benign and Malignant STTs**

Figure s1-s2 shows two typical examples of benign and malignant STTs on US. One was a histologically verified synovial sarcoma of a 70-year-old man who had a painful lesion in his right elbow for 2 months. The grayscale US presented a large mass with a maximum diameter of 86 mm that was predominantly hypoechoic, solid, heterogeneous, and in the deep fascia layer and had an irregular shape, an ill-defined boundary, and a rough margin (Figure s1A). The destruction of bone adjacent to the mass was also observed. CDFI indicated increased vascularity (grade III) in the central and peripheral regions of the mass (mixed vascular type) (Figure s1B). Another case was a histologically verified lipoma of a 72-year-old man with a gradually enlarging posterior neck mass for 2 years. The grayscale image showed that the mass was predominantly hyperechoic, solid, homogeneous and in the superficial fascia layer with a maximum diameter of 47 mm and had a regular shape, a well-defined boundary, and a smooth margin (Figure s2A). The CDFI of the mass exhibited grade 0 vascular density and absence of the vascular type (Figure s2B).


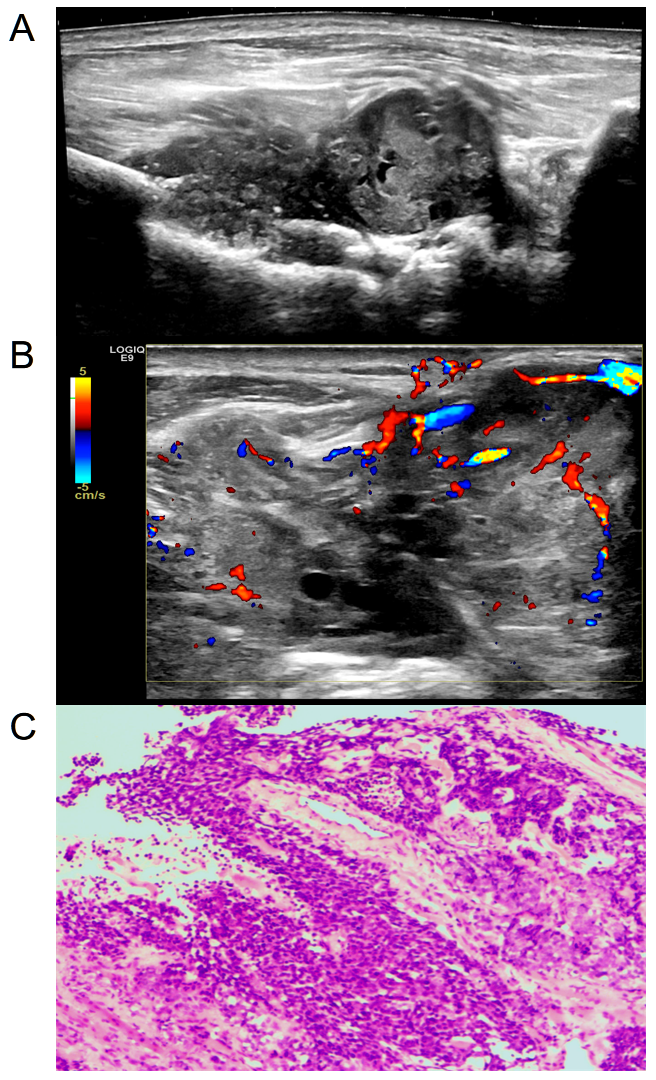


**Figure s1. A-C:** A case of a 70-year-old man with histologically verified synovial sarcoma in the right elbow. **A.** Grayscale US: predominantly hypoechoic, heterogeneous, irregular shape, ill-defined boundary, rough margin. **B.** CDFI: grade III vascular density. (Please note the visibility of osseous invasion.) **C.** Hematoxylin-eosin (HE) staining: multiple short fusiform tumor cells separated by collagen fibers.


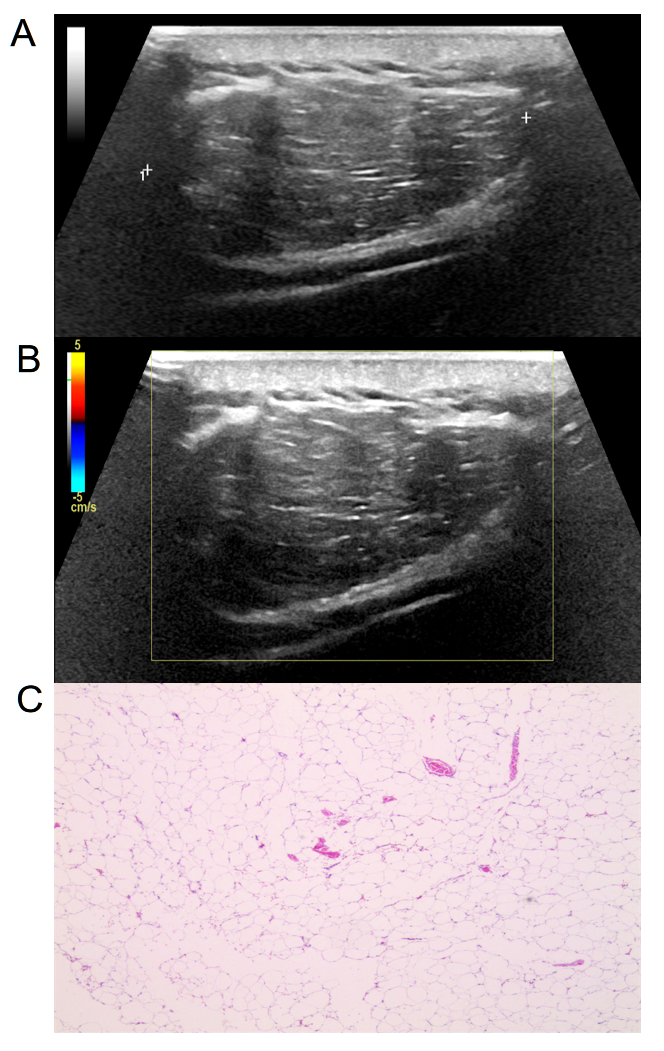


**Figure s2. A-C:** A case of a 72-year-old man with histologically verified lipoma in the posterior neck. **A.** Grayscale US: predominantly hyperechoic, homogeneous, regular shape, well-defined boundary, smooth margin. **B.** CDFI: no intratumoral vessels. **C.** HE staining: mature adipocytes with no atypical cells.
